# Supplementary material
Source: PubMed Central journal article supplement (PMC5580273)

## Appendix

### Supplemental Materials

#### Increasing Use of Allogeneic Hematopoietic Cell Transplantation in Patients Age 70 Years and Older in the United States

Muffly L. et al

Table A: Detailed Characteristics of AML Patients 70 Years and Older Transplanted between 2008 and 2013.

| Characteristics of patients                               | N (%)        |
|-----------------------------------------------------------|--------------|
| Number of patients                                        | 120          |
| Number of centers                                         | 46           |
| Age                                                       |              |
| Median (range), years                                     | 72 (70 - 81) |
| 70-74                                                     | 105 (88)     |
| 75-79                                                     | 14 (12)      |
| $\geq 80$                                                 | 1 (<1)       |
| Sex                                                       |              |
| Male                                                      | 83 (69)      |
| Female                                                    | 37 (31)      |
| Karnofsky score                                           |              |
| <90%                                                      | 42 (35)      |
| 90-100%                                                   | 77 (64)      |
| Unknown                                                   | 1 (<1)       |
| HCT-CI                                                    |              |
| 0                                                         | 28 (23)      |
| 1-2                                                       | 32 (27)      |
| $\geq 3$                                                  | 60 (50)      |
| Cytogenetics                                              |              |
| Favorable                                                 | 5 ( 4)       |
| Intermediate                                              | 84 (70)      |
| Poor                                                      | 30 (25)      |
| Not tested                                                | 1 (<1)       |
| FLT-3 mutation                                            |              |
| Mutated                                                   | 10 ( 8)      |
| Wild type                                                 | 59 (49)      |
| Unknown                                                   | 51 (43)      |
| Disease status prior to transplant                        |              |
| Early disease                                             | 64 (53)      |
| Intermediate disease                                      | 19 (16)      |
| Advanced disease                                          | 37 (31)      |
| Time from diagnosis to transplant, median (range), months | 7 (2 - 49)   |
| AML in remission (any CR)                                 |              |
| No                                                        | 37 (31)      |
| Yes                                                       | 83 (69)      |
| Donor type for analysis                                   |              |

| Characteristics of patients                | N (%)        |
|--------------------------------------------|--------------|
| HLA-matched related                        | 19 (16)      |
| HLA-mismatched related                     | 8 ( 7)       |
| HLA-matched URD                            | 54 (45)      |
| HLA-mismatched URD                         | 10 ( 8)      |
| URD HLA match unknown                      | 4 ( 3)       |
| UCB                                        | 25 (21)      |
| Unrelated donor age, median (range), years | 29 (19 - 52) |
| 18-30                                      | 37 (54)      |
| 31-40                                      | 17 (25)      |
| 41-50                                      | 7 (10)       |
| 51-61                                      | 1 ( 1)       |
| Missing                                    | 6 ( 9)       |
| D-R sex match                              |              |
| M-M                                        | 46 (38)      |
| M-F                                        | 20 (17)      |
| F-M                                        | 28 (23)      |
| F-F                                        | 11 ( 9)      |
| Missing                                    | 15 (13)      |
| D-R CMV status                             |              |
| +/+                                        | 24 (20)      |
| +/-                                        | 12 (10)      |
| -/+                                        | 45 (38)      |
| -/-                                        | 19 (16)      |
| Missing                                    | 20 (17)      |
| Graft source                               |              |
| Bone marrow                                | 9 ( 8)       |
| Peripheral blood                           | 86 (72)      |
| Umbilical cord blood                       | 25 (21)      |
| Conditioning regimen intensity             |              |
| Myeloablative                              | 11 ( 9)      |
| RIC                                        | 69 (58)      |
| NMA                                        | 40 (33)      |
| Conditioning regimen                       |              |
| Flu/Bu+/-other                             | 36 (30)      |
| Flu/Mel+/-other                            | 18 (15)      |
| Flu/TBI+/-other                            | 52 (43)      |
| Bu-based                                   | 4 ( 3)       |
| Flu/Cy+/-other                             | 1 (<1)       |
| TBI/TLI+/-other                            | 8 ( 7)       |
| Others                                     | 1 (<1)       |
| GVHD prophylaxis                           |              |
| T-cell depletion                           | 5 ( 4)       |
| CNI+MMF+/-other                            | 60 (50)      |
| CNI+MTX+/-other                            | 42 (35)      |
| CNI+/-other (no MMF or MTX)                | 7 ( 6)       |
| Post-Cy+/-other                            | 5 ( 4)       |
| Other                                      | 1 (<1)       |
| Year of transplant                         |              |
| 2008-2011                                  | 63 (53)      |
| 2012-2013                                  | 57 (48)      |

| Characteristics of patients                  | N (%)       |
|----------------------------------------------|-------------|
| Median follow-up of survivors, range, months | 30 (6 - 73) |

**Supplementary Figure 1A:** Cumulative incidence of transplant related mortality of patients 70 years and older with early or intermediate AML and MDS, and recipients of an allogeneic hematopoietic cell transplantation from 2008 to 2013 stratified according to HCT CI.

**Supplementary Figure 1B:** Probability of overall survival of patients 70 years and older with early or intermediate AML and MDS, and recipients of an allogeneic hematopoietic cell transplantation from 2008 to 2013 stratified according to HCT CI.

**Supplementary Figure 1C:** Cumulative incidence of transplant related mortality of patients 70 years and older with advanced AML and MDS, and recipients of an allogeneic hematopoietic cell transplantation from 2008 to 2013 stratified according to HCT CI.

**Supplementary Figure 1D:** Probability of overall survival of patients 70 years and older with advanced AML and MDS, and recipients of an allogeneic hematopoietic cell transplantation from 2008 to 2013 stratified according to HCT CI.

### Supplementary Figure 1A

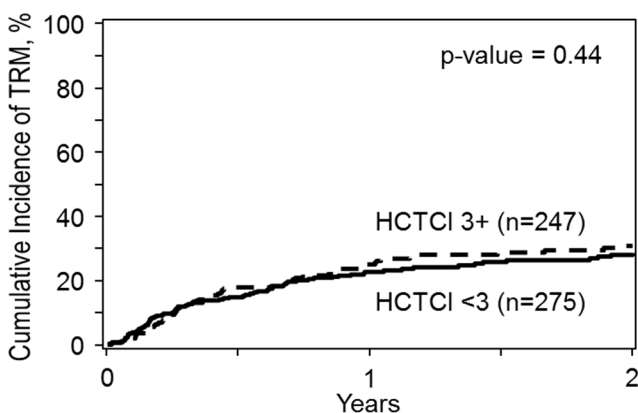

**Supplementary Figure 1B**

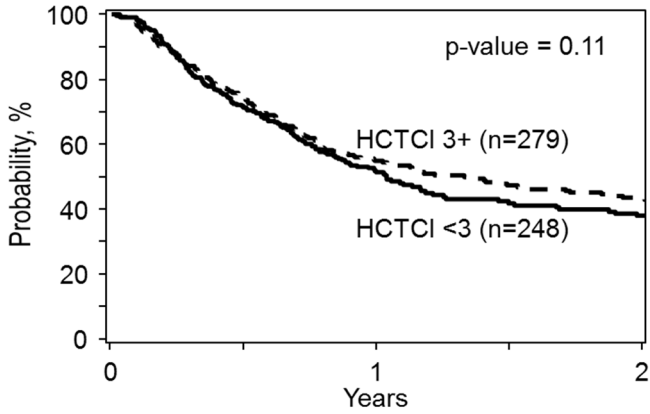

**Supplementary Figure 1C**

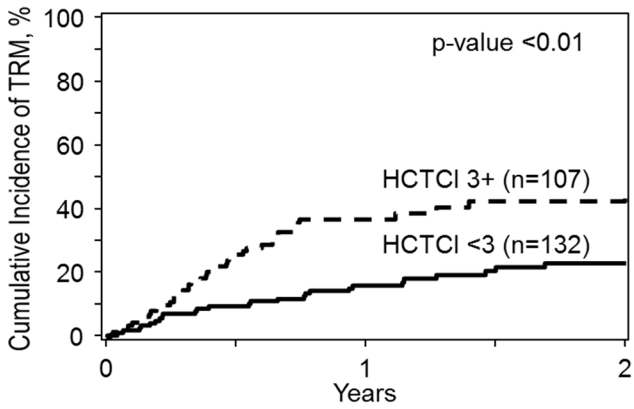

**Supplementary Figure 1D**

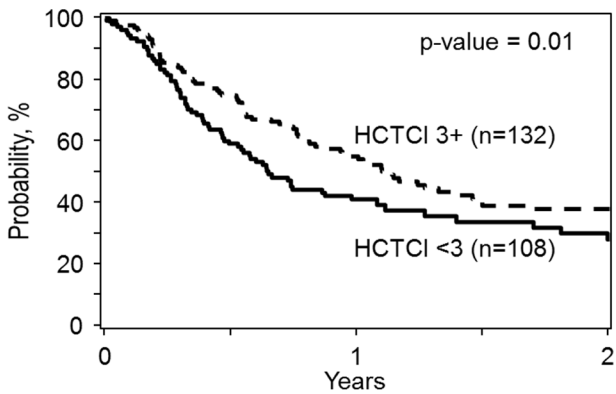

Supplement: blood772368-suppl1.pdf [file blood772368-suppl1.pdf]
